# Supplementary material for: GRIN2A: involvement in movement disorders and intellectual disability without seizures
Source: Springer Nature journal article supplement (doi:10.1007/s10072-019-03923-2), 2019-05-16
Supplement: MOESM1 [file 16728798]

Supplementary table 1

Gene Lists (RefSeq) for multi-gene panel testing adopted for channolopaties and epileptic encephalopathies.

| ATP1A2 (NM_000702.3), CACNB4 (NM_000726.4), CHRNA2 (NM_000742.3), CHRNA4 (NM_000744.6), GABRD (NM_000815.4), GRIN2B (NM_000834.4), SCN2A (NM_001040143.1), SLC9A6 (NM_001042537.1), ALG13 (NM_001099922.2), FLNA (NM_001110556.1), MECP2 (NM_001110792.1), IQSEC2 (NM_001111125.2), GABRA1 (NM_001127645.1), SPTAN1 (NM_001130438.2), GRIN2A (NM_001134407.2), PRICKLE1 (NM_001144881.1), NEDD4L (NM_001144967.2), KCNMA1 (NM_001161352.1), ARHGEF9 (NM_001173479.1), CACNA2D2 (NM_001174051.2), CASR (NM_001178065.1), PCDH19 (NM_001184880.1), GRIN1 (NM_001185090.1), CHRNA7 (NM_001190455.2), SLC25A22 (NM_001191061.1), ALDH7A1 (NM_001201377.1), TCF4 (NM_001243226.2), PRRT2 (NM_001256442.1), CHD2 (NM_001271.3), BRD2 (NM_001291986.1), CLCN4 (NM_001830.3), EEF1A2 (NM_001958.3), ME2 (NM_002396.4), PIGA (NM_002641.3), MAPK10 (NM_002753.4), SCN9A (NM_002977.3), CDKL5 (NM_003159.2), STXBP1 (NM_003165.3), CLCN2 (NM_004366.5), KCNQ3 (NM_004519.3), NRXN1 (NM_004801.5), MTOR (NM_004958.3), SCARB2 (NM_005506.3), EPM2A (NM_005670.3), SLC2A1 (NM_006516.2), SYNGAP1 (NM_006772.2), SCN1A (NM_006920.5), SYN1 (NM_006950.3), PNKP (NM_007254.3), MAGI2 (NM_012301.3), CNTNAP2 (NM_014141.5), SCN8A (NM_014191.3), PLCB1 (NM_015192.3), SZT2 (NM_015284.3), SAMHD1 (NM_015474.3), EFHC1 (NM_018100.3), PNPO (NM_018129.3), MBD5 (NM_018328.4), KCNT1 (NM_020822.2), HCN1 (NM_021072.3), CACNA1H (NM_021098.2), CACNA1A (NM_023035.2), RNASEH2B (NM_024570.3), HNRNPU (NM_031844.2), PIGO (NM_032634.3), UBE3A (NM_130839.2), GNAO1 (NM_138736.2), ARX (NM_139058.2), KCNH5 (NM_139318.4), KCTD7 (NM_153033.4), KCNQ2 (NM_172107.3), ARHGEF15 (NM_173728.3), NHLRC1 (NM_198586.2), PRICKLE2 (NM_198859.3), GABRG2 (NM_198903.2), SCN1B (NM_199037.4), CASK (NM_003688.3), CHRNB2 (NM_000748.2), CSTB (NM_000100.3), FOXG1 (NM_005249.4), GABRB3 (NM_000814.5), ADGRV1 (NM_032119.3), MEF2C (NM_002397.4), PIGV (NM_017837.3), RNASEH2A (NM_006397.2), RNASEH2C (NM_032193.3), SLC35A2 (NM_001042498.2), TBC1D24 (NM_001199107.1), TREX1 (NM_033629.5), ZEB2 (NM_014795.3). |
| --- |
